# Supplementary material
Source: PubMed Central journal article supplement (PMC5513868)
Supplement: BPH-174-2457-s001.pdf [file BPH-174-2457-s001.pdf]

---

*Supporting Information*

*For*

**Natural alkaloid bouchardatine ameliorates metabolic disorders in high fat fed mice via stimulating the SIRT1-LKB1-AMPK axis**

Yong Rao<sup>a</sup>, Hong Yu<sup>a</sup>, Lin Gao<sup>a</sup>, Yu-Ting Lu<sup>a</sup>, Zhao Xu<sup>a</sup>, Hong Liu<sup>a</sup>, Lian-Quan Gu<sup>a</sup>, Ji-Ming Ye<sup>b,\*</sup>,  
Zhi-Shu Huang<sup>a,\*</sup>

<sup>a</sup> *Institute of Medicinal Chemistry, School of Pharmaceutical Sciences, Sun Yat-sen University,  
Guangzhou 510006, China*

<sup>b</sup> *Molecular Pharmacology for Diabetes Group, School of Health and Biomedical Sciences, RMIT University,  
Melbourne, VIC, 3083 Australia*

**Table of Contents**

|                                                                                                          |    |
|----------------------------------------------------------------------------------------------------------|----|
| <b>Materials</b> .....                                                                                   | S2 |
| <b>Table S1.</b> Primers sequences used for PCR.....                                                     | S3 |
| <b>Table S2</b> Information of Antibody.....                                                             | S3 |
| <b>Figure S1.</b> Effect of resveratrol ( <b>Res</b> ) on the TG levels and SIRT1 activity in cells..... | S4 |
| <b>Figure S2.</b> Effect of SRT1720 on LKB1 translocation in 3T3-L1 adipocytes.....                      | S5 |
| <b>Figure S3.</b> Toxicity analysis of Bou <i>in vivo</i> .....                                          | S5 |
| <b>Figure S4.</b> Expression levels of cytochrome C and 18S rRNA in tissues.....                         | S6 |

---

## Materials

Fetal bovine serum (10099-141, Gibco, USA), Oleic acid sodium (OAS) (O1008 ,sigma, USA), DMEM/F12 (11330032, Gibco, USA), Peridochrom TG GPO-PAP kit (A110-1, JianCheng Bio, China), NAD<sup>+</sup>/NADH Quantification Kit (#337-100, BioVision, USA), AMP/ATP Quantification Kit (MAK-135, Sigma-Aldrich, USA), ATP determination (S0026, Beyotime, China), SIRT1 Fluorometric Drug Discovery Kit (BLM-AK555, Enzo Life Sciences, Switzerland), SRT1720 (S1129, Selleck, USA), RNAiso Plus (9018, Takara, Japan), AlexaFluor-conjugated secondary antibody (#A32727, Life Technologies, USA), protein G/A beads (#88805, Thermo, USA), LKB1 plasmid (Vigene, USA), control siRNA/SIRT1 siRNA (RiboBio, China), Lipofectamin 3000 (L3000-015, Invitrogen, USA), Co-immunoprecipitation Assay Kit (#88805, Thermo, USA), DNeasy Blood and Tissue kit (#69504, Qiagen, Germany), 60% fat-high fat diet (MD12033, DietResearch, USA), ultra-sensitive insulin Elisa Kit (#90080, Crystal Chem, USA).

**Table S1.** Primers sequences used for PCR.

| Gene           | Forward primer(5'-3')   | Reversed primer(5'-3')   |
|----------------|-------------------------|--------------------------|
| SIRT-1         | GACCTCCCAGACCCTCAAGC    | TGTGACACAGAGACGGCTGG     |
| PGC-1 $\alpha$ | CTCAGTAAGGGGCTGGTTGC    | AGGGCAATCCGTCTTCATCC     |
| PPAR $\alpha$  | CCTGGAAAGTCCCTTATCT     | GCCCTTACAGCCTTCACAT      |
| UCP-1          | CGTACCAAGCTGTGCGATGT    | AAGCCACAAACCCTTTGAAAAAG  |
| NRF-2          | GGTTCAGTGA CT CGGAAATGG | GAGAATGTGCTGGCTGTGCT     |
| CPT-1b         | TAGGCCTCAACACCGAACAC    | TGCCTTGGCTACTTGGTACG     |
| ACSL           | TGGGGTGGAAATCATCAGCC    | CATTGCTCCTTTGGGGTTGC     |
| Dio2           | CAGTGTGGTGCACGTCTCCAATC | TGAACCAAAGTTGACCACCAG    |
| Actin          | CTGAATCTGCACCAAGCATGA   | TAAAACGCAGCTCAGTAACAGTCC |
| Cyto C         | TCGGAACCCTCTACCTATT     | GGCTGTGACGATGACATTAA     |
| 18S rRNA       | AACTTTCGATGGTAGTCGC     | TTCCTTGGATGTGGTAGCC      |

**Table S2** Information of Antibody

| Antibody name                        | Dilution ratio | Cat number | Company                   | Location |
|--------------------------------------|----------------|------------|---------------------------|----------|
| UCP1                                 | 1:1000         | ab10983    | Abcam                     | USA      |
| PGC-1 $\alpha$                       | 1:1000         | ab54481    | Abcam                     | USA      |
| GAPDH                                | 1:1000         | #97166     | Cell Signaling Technology | USA      |
| AMPK $\alpha$                        | 1:1000         | #5831      | Cell Signaling Technology | USA      |
| pAMPK $\alpha$ (Thr <sup>172</sup> ) | 1:1000         | #2535      | Cell Signaling Technology | USA      |
| ACC                                  | 1:1000         | #3676      | Cell Signaling Technology | USA      |
| pACC(Ser <sup>79</sup> )             | 1:1000         | #11818     | Cell Signaling Technology | USA      |
| FAS                                  | 1:1000         | #3810      | Cell Signaling Technology | USA      |
| SCD1                                 | 1:1000         | #2794      | Cell Signaling Technology | USA      |
| SREBP-1c                             | 1:250          | sc-367     | Santa Cruz Biotechnology  | USA      |
| LKB1                                 | 1:250          | sc-5638    | Santa Cruz Biotechnology  | USA      |
| pLKB1(Ser <sup>431</sup> )           | 1:250          | sc-28465   | Santa Cruz Biotechnology  | USA      |
| Acetyl-Lys                           | 1:100          | sc-81623   | Santa Cruz Biotechnology  | USA      |
| Lamin B                              | 1:1000         | sc-374015  | Santa Cruz Biotechnology  | USA      |
| SIRT1                                | 1:1000         | A0230      | ABclonal Biotechnology    | USA      |

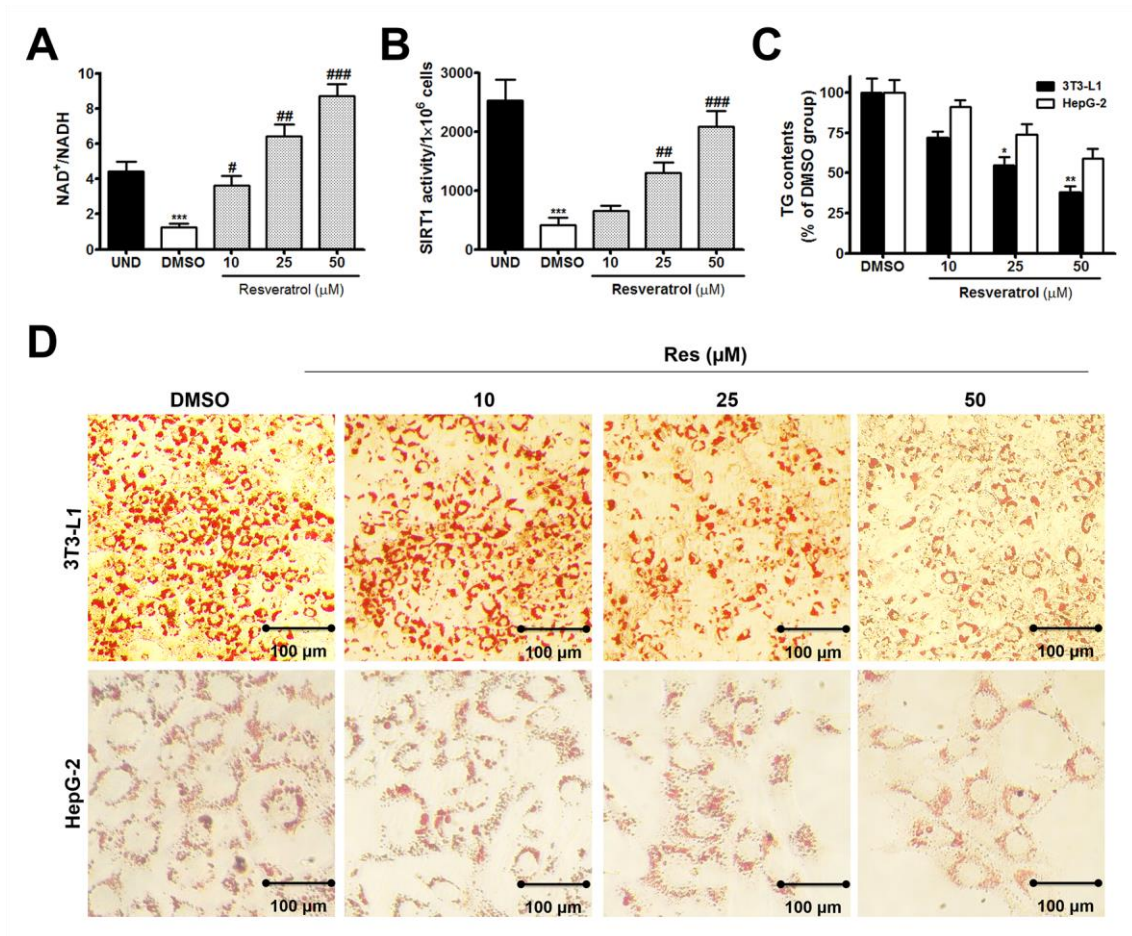

**Figure S1.** Effect of resveratrol (Res) on the TG levels and SIRT1 activity in cells. (A) Effect of Res on the ratio of NAD<sup>+</sup>/NADH in 3T3-L1 adipocytes. \* $p < 0.05$ , \*\* $p < 0.01$ , \*\*\* $p < 0.001$  compared with UND group; # $p < 0.05$ , ## $p < 0.01$ , ### $p < 0.001$  compared with DMSO treatment group. (B) Effect of Res on the deacetylase activity of SIRT1 in 3T3-L1 adipocytes. \* $p < 0.05$ , \*\* $p < 0.01$ , \*\*\* $p < 0.001$  compared with UND group; # $p < 0.05$ , ## $p < 0.01$ , ### $p < 0.001$  compared with DMSO treatment group. (C-D) TG content analysis by TG assays and Oil-Red O staining. \* $p < 0.05$ , \*\* $p < 0.01$ , \*\*\* $p < 0.001$  compared with DMSO group. Data are expressed as means  $\pm$  standard errors from 5 independent experiments.

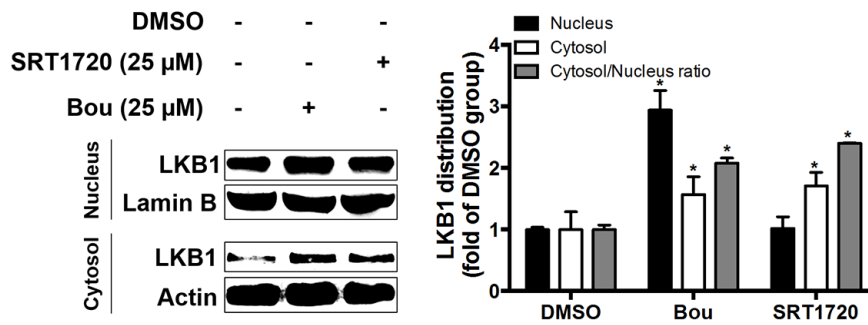

**Figure S2.** SRT1720 increases LKB1 translocation to cytosol in 3T3-L1 adipocytes. Confluent 3T3-L1 pre-adipocytes were exposed to adipogenic cocktail (MDI) for consecutive 9 days in the presence or absence of SRT1720 treatment. After treatment, LKB1 in cytosol and nucleus were extracted and determined by western blot, GAPDH and Lamin B were loaded as loading control. \* $p < 0.05$ , compared with DMSO group.

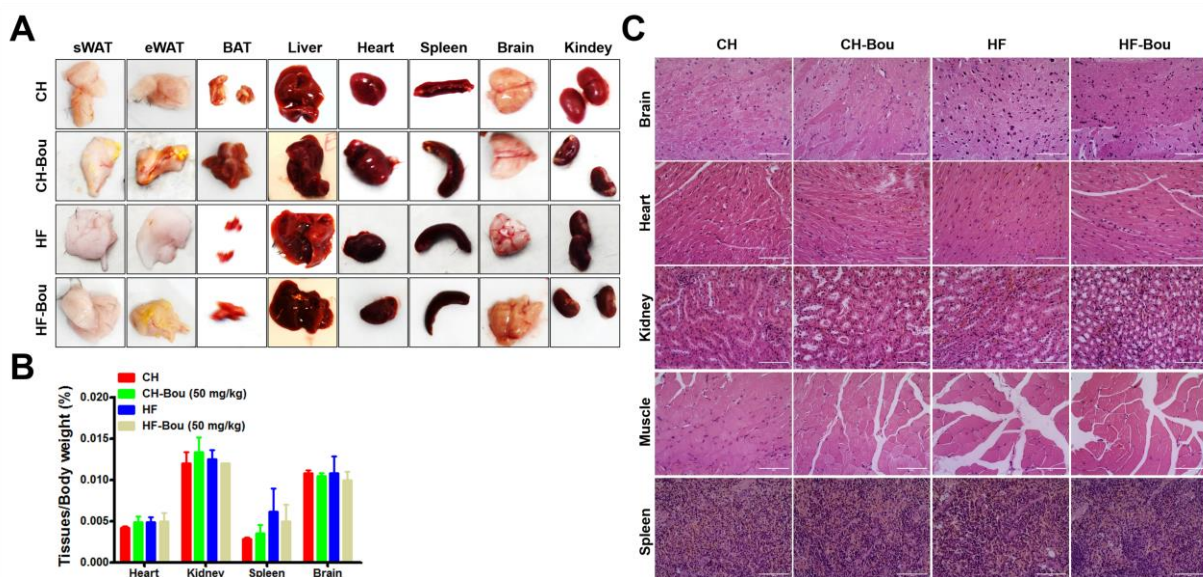

**Figure S3.** Toxicity analysis of bouchardatine *in vivo*. (A) Appearance of tissue was captured. (B-C) Tissue/body weight ratio. (C) Representative H&E staining from tissue sections after 5 weeks of **Bou** treatment. Original magnification, 100 $\times$ . Scale bar, 100  $\mu$ m.

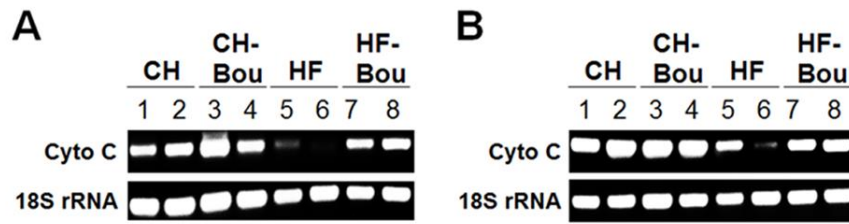

**Figure S4.** Expression levels of Cytochrome C gene (for mtDNA) and 18S rRNA (for nuclear DNA) in eWAT (A) and BAT (B) of mice.
